# Supplementary material
Source: publisher site journal article supplement (https://www.dovepress.com/get_supplementary_file.php?f=259156.docx)
Supplement: Supplementary file 1 [file get_supplementary_file.php]

**Electronic Supplementary Material (ESI)**

**Multifunctional Quaternary Phosphorus/Bromoargentate Hybrids: the Achievement of Greenish Blue Luminescence, Repeatable Photocurrent Responses and Durable Antibacterial Activities with Enhanced Water Stability**

Jing-Bo Liu,a Qiao-Jun Zhang, b Jian-Zhi Liu,*a Wen-Ting Zhang,c Yi Li,c Hao-Hong Li,c Wei Lin, c Zhi-Rong Chenc and Da-Li Zheng*b

a Department of Otorhinolaryngology, Fujian Medical University Union Hospital, Fuzhou, Fujian, 350001, China.

b Fujian Key Laboratory of Oral Diseases, Fujian Biological Materials Engineering and Technology Center of Stomatology, School and Hospital of Stomatology, Fujian Medical University, Fuzhou, Fujian, 350004, China.

c College of chemistry, Fuzhou University, Fuzhou, Fujian, 350116, China.

**Synthesis of quaternary phosphorus salts**

Three alkyl-bis-(triphenyl)phosphonium bromides (1,2-DBTPP)Br2, (1,3-DBTPP)Br2 and (1,4-DBTPP)Br2) were synthesized according to the same synthetic procedure, using triphenylphosphonium and 1,2-dibromoethane, 1,3-dibromopropane, 1,4-dibromobutane as starting materials (Scheme S1). Haloalkanes (10 mmol) and Ph3P (30 mmol) were dissolved in 10 mL DMF, which were reacted at 130 °C for 4h. Afterwards the mixtures were cooled to room temperature, and then the solvent was removed by rotation volatilization to give raw products, which were washed with *n*-hexane and dried in the oven. White powders can be obtained with yield of higher than 90%. Their 1H NMR and 31P NMR spectra can be seen in Fig. S1.

**(1,2-DBTPP)Br2**: 1H NMR (400 MHz, Chloroform-d) δ: 7.86-7.75 (m, 18H), 7.71 (d, J =7.1 Hz,12H), 3.74 (dq, J =13.9, 7.2 Hz,4H). 31P NMR (202 MHz, CDCl3): 26.43 (s).

**(1,3-DBTPP)Br2:** 1H NMR (400 MHz, Chloroform-d) δ: 7.86 (dd, J = 11.8, 8.0 Hz, 12H), 7.67 (t, J = 7.4 Hz, 6H), 7.57 (t, J = 6.7 Hz, 12H), 4.58 (t, J = 13.8 Hz, 4H), 2.07 (s, 2H). 31P NMR (202 MHz, CDCl3): 24.33 (s).

**(1,4-DBTPP)Br2:** 1H NMR (400 MHz, Chloroform-d) δ:7.86 (dd, J = 12.6, 7.6 Hz, 12H), 7.66 (dd, J =14.5, 7.1 Hz, 18H), 4.00 (s, 4H), 2.19 (s, 4H). 31P NMR (202 MHz, CDCl3): 24.55 (s)**.**

**Table S1 Summary of the crystal data and structure determination for 1-3**

| Compound | **1** | **2** | **3** |
| --- | --- | --- | --- |
| Empirical formula | C38H34Ag2Br4P2 | C80H73Ag7Br11NOP4 | C44H46Ag5Br7N2OP2 |
| Formula mass | 1087.93 | 2824.26 | 1779.48 |
| Crystal system | Monoclinic | Monoclinic | Monoclinic |
| Space group | *C2/c* | *P2*1*/m* | *Pnma* |
| *a*[Å] | 22.912(4) | 13.743(4) | 13.323(2) |
| *b*[Å] | 9.8676(12) | 23.465(6) | 28.623(5) |
| *c* [Å] | 19.266(4) | 14.193(4) | 15.867(3) |
| *β*[º] | 122.39(3) | 104.516(5) | 90.00 |
| *V*[Å] | 3678.2(10) | 4431(2) | 6050.8(18) |
| Z | 4 | 2 | 4 |
| *D*c[g/cm3] | 1.965 | 2.115 | 1.951 |
| *μ*[mm－1] | 5.524 | 6.589 | 6.295 |
| F(000) | 2014 | 2684 | 3360 |
| Reflections, total | 7897 | 11934 | 19863 |
| Reflections, unique | 3091(*R*int=0.0606) | 7202(*R*int=0.0822) | 5381 (*R*int=0.0391) |
| Reflections, observed | 2444 | 3283 | 3756 |
| Goodness-of-fit on *F*2 | 0.960 | 1.007 | 1.052 |
| No. of parameters refined | 149 | 487 | 284 |
| *R*1[*I*>2*σ*(*I*)] | 0.0610 | 0.0811 | 0.0558 |
| *wR*2 [*I*>2*σ*(*I*)] | 0.1577 | 0.1922 | 0.1472 |
| Residual extremes(e/Å3) | 1.365, -2.33 | 2.966, -2.328 | 1.750,-1.685 |

**Table S2 Selected bond distances (in Å) and angles (in °) for 1-3**

| **Compound 1** | | | | | |
| --- | --- | --- | --- | --- | --- |
| Ag(1)-Br(1) | 2.6632(11) | Ag(1)-Br(2) | 2.5356(11) | Ag(1)-Br(1)#1 | 2.6961(14) |
| Ag(1)-Ag(1)#1 | 3.0253(14) |  |  |  |  |
| Br(2)-Ag(1)-Br(1) | 126.38(4) | Br(2)-Ag(1)-Br(1)#1 | 121.23(4) | Br(1)-Ag(1)-Br(1)#1 | 111.27(3) |
| **Compound 2** | | | | | |
| Ag(1)-Br(1) | 2.863(4) | Ag(1)-Br(2) | 2.753(3) | Ag(1)-Br(2)#2 | 2.753(3) |
| Ag(1)-Br(6)#1 | 2.592(5) | Ag(2)-Br(1) | 2.731(3) | Ag(2)-Br(2) | 2.687(3) |
| Ag(2)-Br(3) | 2.632(3) | Ag(2)-Br(7) | 2.877(3) | Ag(3)-Br(3) | 2.617(3) |
| Ag(3)-Br(4) | 2.653(3) | Ag(3)-Br(5) | 2.671(3) | Ag(3)-Br(7) | 2.905(3) |
| Ag(4)-Br(5) | 2.507(2) | Ag(4)-Br(5)#2 | 2.507(2) | Ag(4)-Br(6) | 2.782(5) |
| Ag(5)-Br(2) | 2.832(3) | Ag(5)-Br(2)#2 | 2.832(3) | Ag(5)-Br(7) | 2.789(4) |
| Ag(5)-Br(8) | 2.535(6) | Ag(1)-Ag(2) | 3.139(3) | Ag(1)-Ag(5) | 3.287(5) |
| Ag(2)-Ag(3) | 3.026(3) | Ag(2)-Ag(2)#2 | 3.323(4) |  |  |
| Br(6)#1-Ag(1)-Br(2) | 109.23(10) | Br(6)#1-Ag(1)-Br(2)#2 | 109.23(10) | Br(2)-Ag(1)-Br(2)#2 | 108.91(15) |
| Br(6)#1-Ag(1)-Br(1) | 118.42(18) | Br(2)-Ag(1)-Br(1) | 105.34(9) | Br(2)#2-Ag(1)-Br(1) | 105.34(9) |
| Br(3)-Ag(2)-Br(1) | 114.40(10) | Br(2)-Ag(2)-Br(1) | 111.02(10) | Br(3)-Ag(2)-Br(7) | 110.41(9) |
| Br(2)-Ag(2)-Br(7) | 100.58(9) | Br(1)-Ag(2)-Br(7) | 104.61(9) | Br(3)-Ag(3)-Br(4) | 122.20(11) |
| Br(3)-Ag(3)-Br(5) | 122.25(10) | Br(4)-Ag(3)-Br(5) | 101.82(10) | Br(3)-Ag(3)-Br(7) | 110.00(9) |
| Br(4)-Ag(3)-Br(7) | 93.72(8) | Br(5)-Ag(3)-Br(7) | 101.55(9) | Br(5)-Ag(4)-Br(5)#2 | 151.28(18) |
| Br(5)-Ag(4)-Br(6) | 103.00(9) | Br(5)#2-Ag(4)-Br(6) | 103.00(9) | Br(8)-Ag(5)-Br(7) | 103.41(18) |
| Br(8)-Ag(5)-Br(2) | 122.46(9) | Br(7)-Ag(5)-Br(2) | 99.27(10) | Br(8)-Ag(5)-Br(2)#2 | 122.46(9) |
| Br(7)-Ag(5)-Br(2)#2 | 99.27(10) | Br(2)-Ag(5)-Br(2)#2 | 104.58(16) |  |  |
| Symmetry code: #1 x-1,y,z; #2 x,-y+3/2,z | | | | | |
| **Compound 3** | | | | | |
| Ag(1)-Br(2)#1 | 2.6473(11) | Ag(1)-Br(2)#2 | 2.6473(11) | Ag(1)-Br(3) | 2.7746(18) |
| Ag(1)-Br(4)#2 | 3.057(2) | Ag(2)-Br(1)#3 | 2.6302(13) | Ag(2)-Br(2)#1 | 2.7604(13) |
| Ag(2)-Br(3) | 3.0770(15) | Ag(2)-Br(5) | 2.6075(15) | Ag(3)-Br(1) | 2.6083(12) |
| Ag(3)-Br(2) | 2.7319(13) | Ag(3)-Br(3) | 2.8393(13) | Ag(3)-Br(4) | 2.6910(13) |
| Ag(1)-Ag(2) | 3.1918(14) | Ag(1)-Ag(3)#1 | 3.0289(13) | Ag(2)-Ag(3)#3 | 3.1914(13) |
| Br(2)#1-Ag(1)-Br(2)#2 | 135.70(8) | Br(2)#1-Ag(1)-Br(3) | 105.41(4) | Br(2)#2-Ag(1)-Br(3) | 105.41(4) |
| Br(2)#1-Ag(1)-Br(4)#2 | 103.99(4) | Br(2)#2-Ag(1)-Br(4)#2 | 103.99(4) | Br(3)-Ag(1)-Br(4)#2 | 95.31(6) |
| Br(1)#3-Ag(2)-Br(3) | 101.91(4) | Br(5)-Ag(2)-Br(1)#3 | 127.98(5) | Br(5)-Ag(2)-Br(2)#1 | 110.37(6) |
| Br(1)#3-Ag(2)-Br(2)#1 | 112.39(4) | Br(5)-Ag(2)-Br(3) | 102.34(4) | Br(2)#1-Ag(2)-Br(3) | 95.14(4) |
| Br(2)-Ag(3)-Br(3) | 99.08(4) | Br(1)-Ag(3)-Br(4) | 118.80(5) | Br(1)-Ag(3)-Br(2) | 114.21(4) |
| Br(4)-Ag(3)-Br(2) | 112.24(5) | Br(1)-Ag(3)-Br(3) | 109.16(4) | Br(4)-Ag(3)-Br(3) | 100.32(4) |
| Symmetry code: #1 x-1/2,-y+1/2,-z+3/2; #2 x-1/2,y,-z+3/2; #3 x,-y+1/2,z | | | | | |

**Table S3 Hydrogen bridging details of 1-3**

| D–H···A | D–H/Å | H···A/Å | D···A/Å | ∠(D–H···A)/º | Symmetry codes |
| --- | --- | --- | --- | --- | --- |
| **Compound 1** | | | | | |
| C(5)-H(5)···Br(2) | 0.93 | 2.90 | 3.802(8) | 163 |  |
| C(6)-H(6)···Br(1) | 0.93 | 2.90 | 3.821(9) | 169 |  |
| C(18)-H(18)···Br(2) | 0.93 | 2.79 | 3.603(9) | 147 | x,1+y,z |
| C(19)-H(19A)···Br(2) | 0.97 | 2.84 | 3.799(8) | 171 | x,1+y,z |
| C(19)-H(19B) ···Br(1) | 0.97 | 2.90 | 3.828(8) | 160 |  |
| **Compound 2** | | | | | |
| C(15)-H(15)···Br(2) | 0.93 | 2.91 | 3.74(2) | 149 | 1-x,1-y,-z |
| C(19)-H(19B)···Br(4) | 0.97 | 2.92 | 3.64(2) | 132 | 2-x,-1/2+y,1-z |
| C(20)-H(20A)···O(1) | 0.97 | 2.50 | 3.30(5) | 141 |  |
| C(37)-H(37)···Br(5) | 0.93 | 2.78 | 3.53(2) | 138 | 2-x,1-y,-z |
| **Compound 3** | | | | | |
| C(17)-H(17)···Br(4) | 0.93 | 2.92 | 3.831(9) | 166 | -1/2+x,1/2-y,3/2-z |
| C(19)-H(19A)···N(1) | 0.97 | 2.54 | 3.488(13) | 167 | -1/2+x,y,1/2-z |
| C(19)-H(19B)···Br(1) | 0.97 | 2.74 | 3.596(6) | 147 | 1/2-x,-y,-1/2+z |

**Scheme S1 Synthesis process of three alkyl-bis-(triphenyl)phosphonium bromides**

**
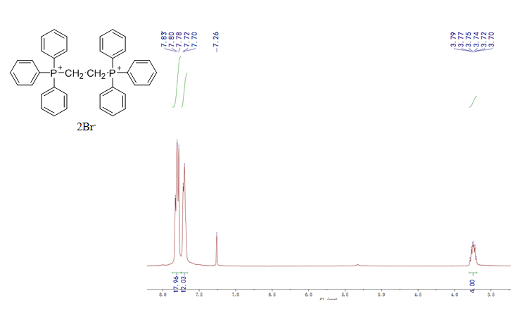
**

**(a)**

**
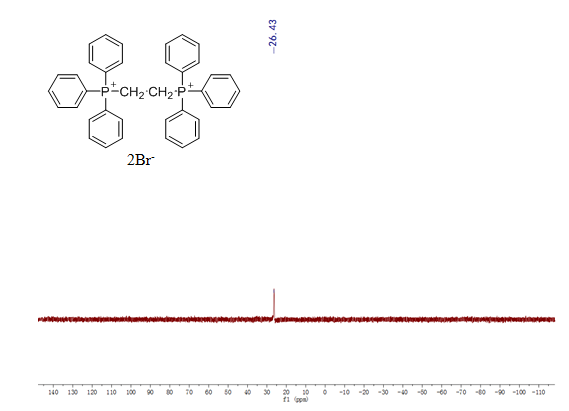
**

**(b)**

**
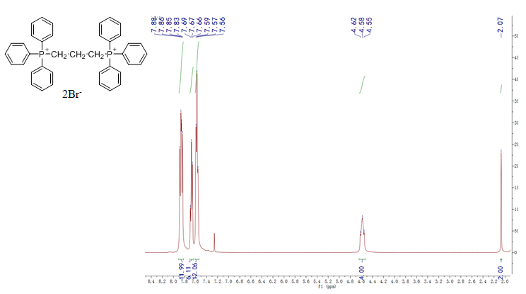
**

**(c)**

**
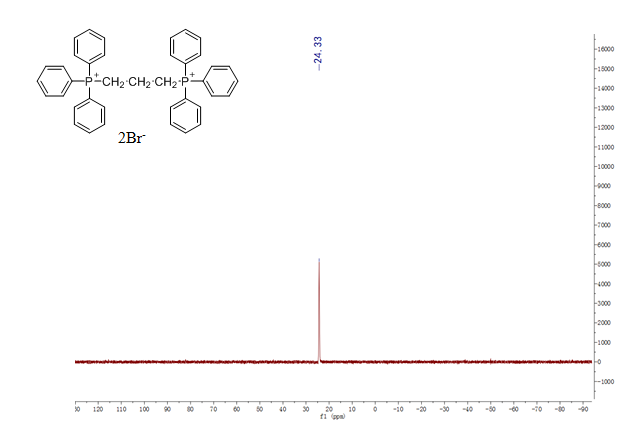
**

**(d)**

**
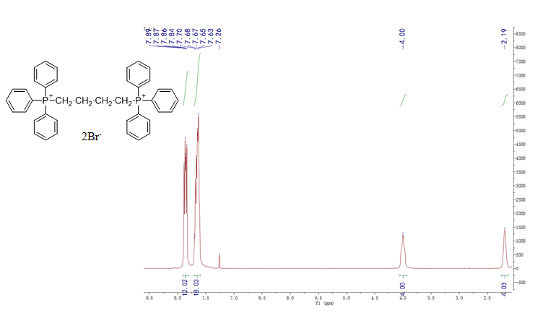
**

**(e)**

**
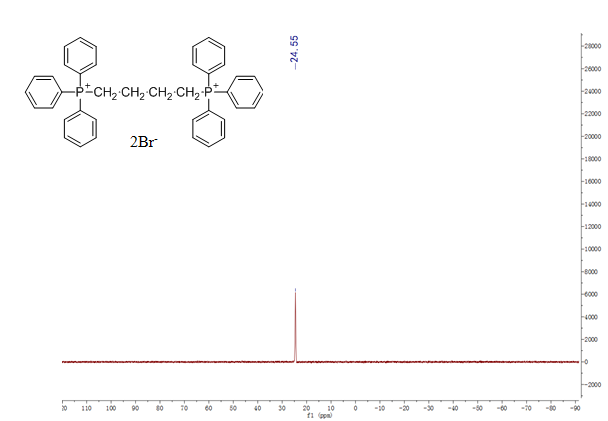
**

**(f)**

**Fig. S1 1H NMR and 1P NMR spectra of (1,2-DBTPP)Br2 (a, b), (1,3-DBTPP)Br2 (c, d), (1,4-DBTPP)Br2 (e, f)**

**
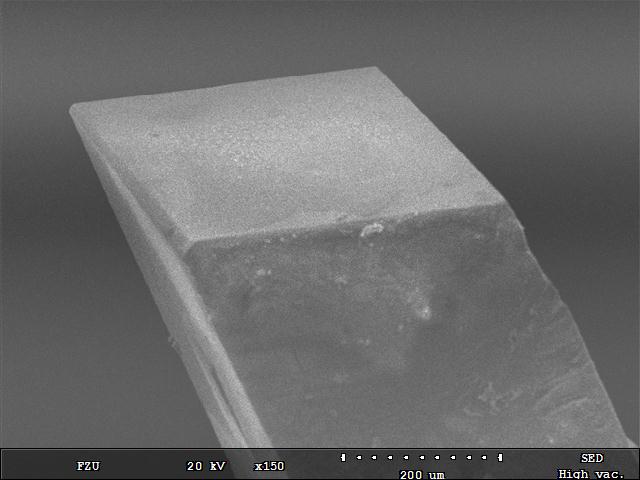
**
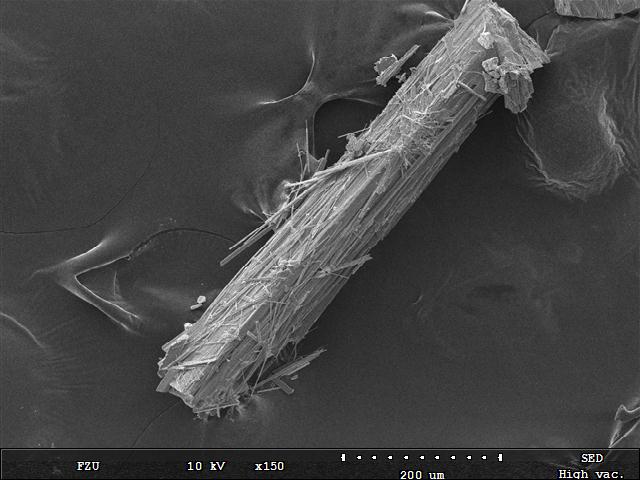


**(a) (b)**


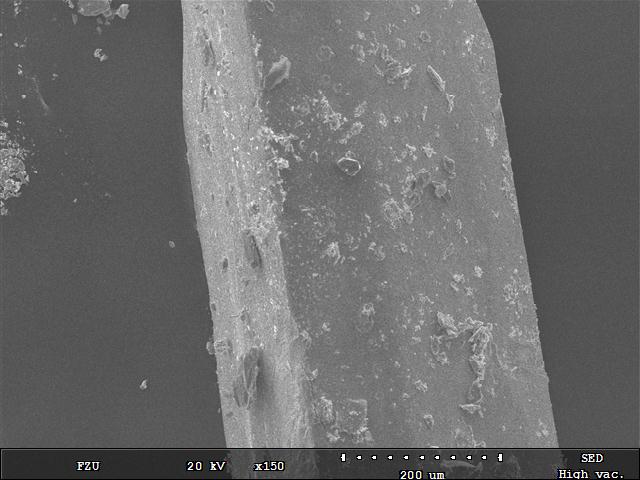


**(c)**

**Fig. S2 SEM diagrams of 1 (a), 2 (b) and 3 (c)**

**
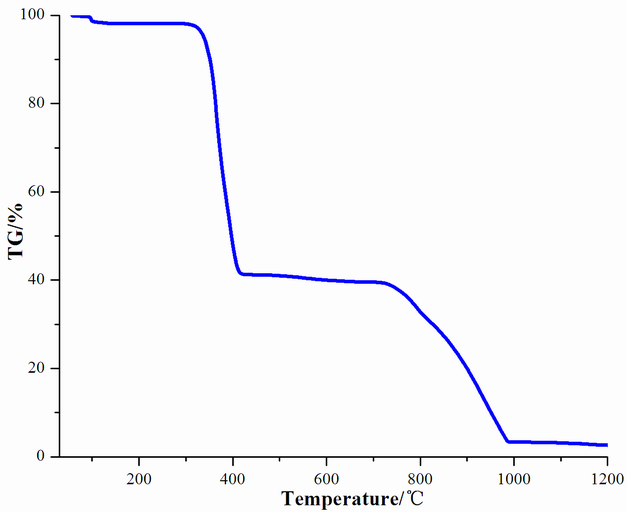
**

**Fig. S3 TG curve of 3**

**
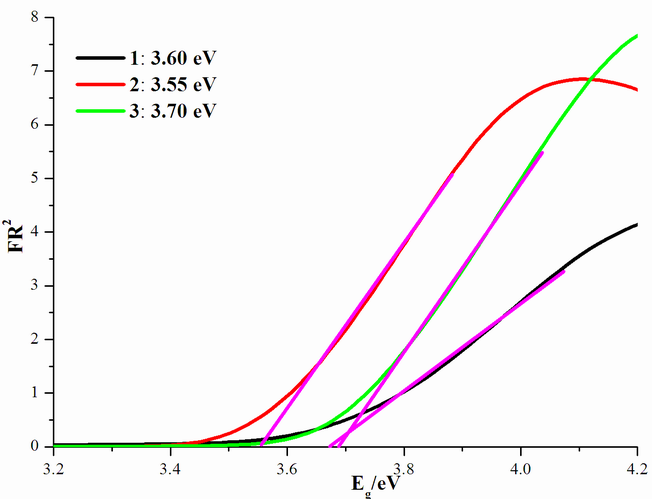
**

**Fig. S4 Optical gaps for 1-3 calculated from the Kubelka–Munk function**
